# Supplementary material for: Controlled synthesis of CuInS2, Cu2SnS3 and Cu2ZnSnS4 nano-structures: insight into the universal phase-selectivity mechanism
Source: Royal Society of Chemistry journal article supplement (doi:10.1039/c3ce40284c), 2013-01-01
Supplement: c3ce40284c.pdf [file c3ce40284c.pdf]

## Supporting Information

### **Controlled synthesis of $\text{CuInS}_2$ , $\text{Cu}_2\text{SnS}_3$ and $\text{Cu}_2\text{ZnSnS}_4$ nanostructures: insight into the universal phase-selectivity mechanism**

Jin Chang and Eric R. Waclawik\*

School of Chemistry, Physics & Mechanical Engineering, Queensland  
University of Technology, 2 George Street, Brisbane (QLD), 4000, Australia



## **Crystal data**

|                      |                                    |                                                          |
|----------------------|------------------------------------|----------------------------------------------------------|
| Formula              | CuInS <sub>2</sub>                 |                                                          |
| Crystal system       | Zincblende                         | Wurtzite                                                 |
| Space group          | <i>F</i> -43m (No. 216)            | <i>P</i> 6 <sub>3</sub> mc (No. 186)                     |
| Unit cell dimensions | $a = b = c = 5.523(8) \text{ \AA}$ | $a = b = 3.897(5) \text{ \AA}, c = 6.441(0) \text{ \AA}$ |

## **Atomic coordinates**

| Atom | Wyck. | x/a | y/b | z/c | Atom | Wyck. | x/a | y/b | z/c    |
|------|-------|-----|-----|-----|------|-------|-----|-----|--------|
| Cu   | 4a    | 0   | 0   | 0   | Cu   | 2b    | 1/3 | 2/3 | 0.3752 |
| In   | 4a    | 0   | 0   | 0   | In   | 2b    | 1/3 | 2/3 | 0.3752 |
| S    | 4a    | 1/4 | 1/4 | 1/4 | S    | 2b    | 1/3 | 2/3 | 0      |

As shown in Figure S1, the Zn<sup>2+</sup> sites in both zincblende and wurtzite ZnS can be replaced by a lower valence Cu<sup>+</sup> and a higher valence In<sup>3+</sup>, giving CuInS<sub>2</sub> with remained crystal structures. Note that both Cu and In atoms occupy the same position and the both occupancy possibilities are 50%. Similarly, the Zn<sup>2+</sup> sites of ZnS can also be replaced by a Cu<sup>+</sup> and a Sn<sup>3+</sup>, resulting zincblende and wurtzite Cu<sub>2</sub>SnS<sub>3</sub> structures. Both Cu and Sn atoms occupy the same position and the occupancy possibilities of Cu and Sn are 2/3 and 1/3, respectively. Furthermore, when Zn<sup>2+</sup> sites in ZnS are replaced by Cu<sup>+</sup>, Zn<sup>2+</sup> and Sn<sup>4+</sup>, zincblende or wurtzite Cu<sub>2</sub>ZnSnS<sub>4</sub> structures are obtained. In this case, Cu, Zn and Sn atoms occupy the same position, the occupancy possibilities of Cu, Zn and Sn are 1/2, 1/4 and 1/4, respectively.

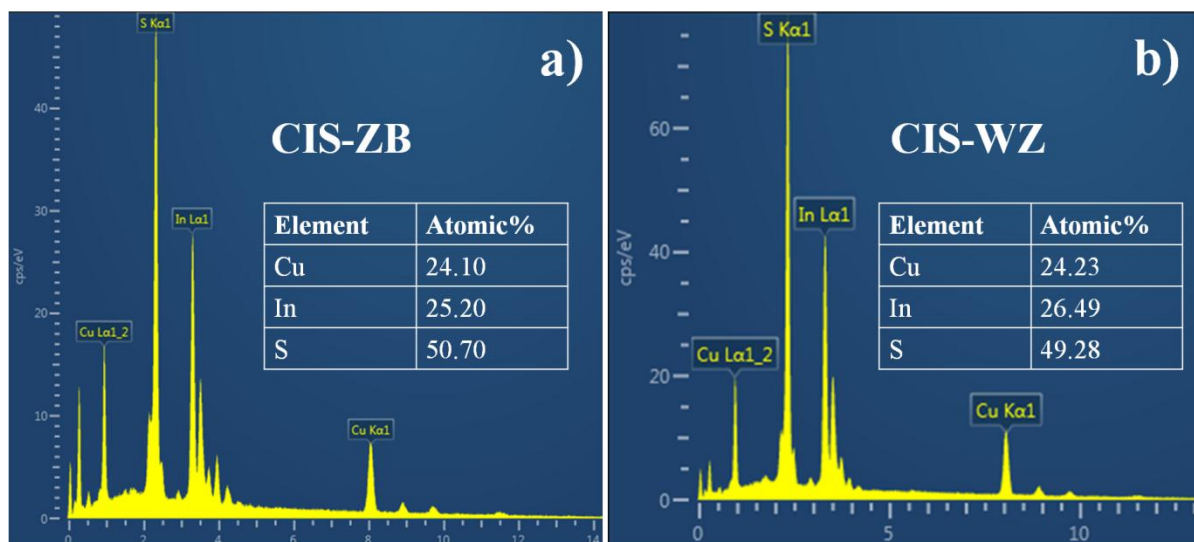

**Fig. S2** EDS spectra of  $\text{CuInS}_2$  nanocrystals with (a) zincblende and (b) wurtzite structures, respectively.

**Table S1** Influence of capping agents variable on the structure of CuInS<sub>2</sub> nanocrystals.

| CIS samples       | OLA    | ODE    | TOPO  | OA     | Crystal Structures |
|-------------------|--------|--------|-------|--------|--------------------|
| A                 | -      | 4.0 mL | -     | -      | ZB                 |
| B                 | 0.5 mL | 3.5 mL | -     | -      | ZB                 |
| C                 | 2.0 mL | 2.0 mL | -     | -      | ZB + WZ            |
| D                 | 3.5 mL | 0.5 mL | -     | -      | WZ                 |
| E                 | 4.0 mL | -      | -     | -      | WZ                 |
| F                 | -      | -      | -     | 4.0 mL | ZB                 |
| G                 | -      | -      | 4.0 g | -      | WZ                 |
| H (hot-injection) | 4.0 mL | -      | -     | -      | ZB                 |

ZB stands for zincblende structure; WZ stands for wurtzite structure.

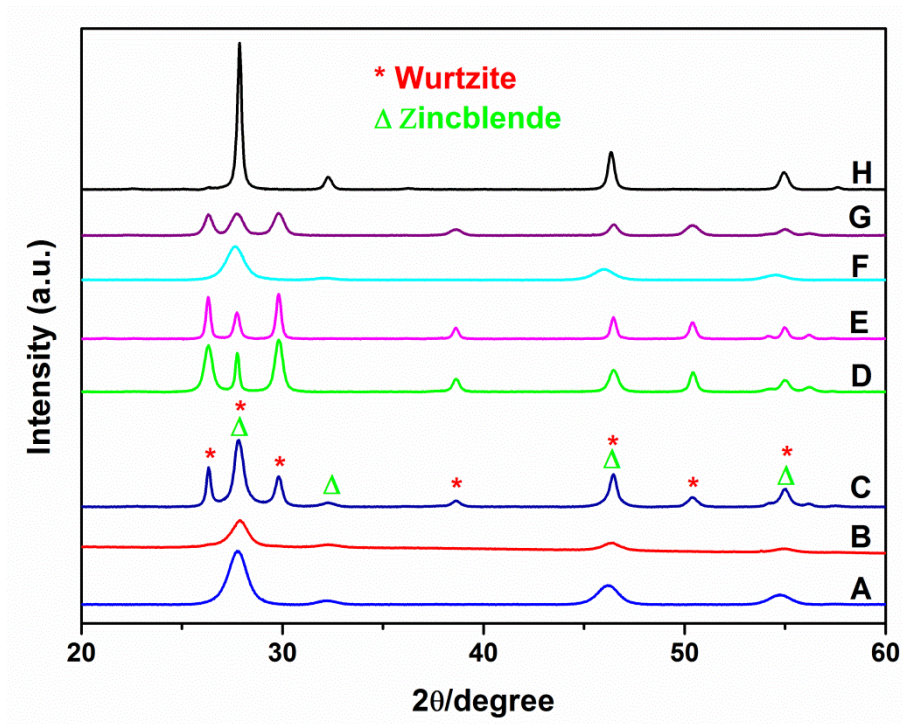

**Fig. S3** XRD patterns of CuInS<sub>2</sub> samples A-H prepared in various reaction conditions listed in Table S1.

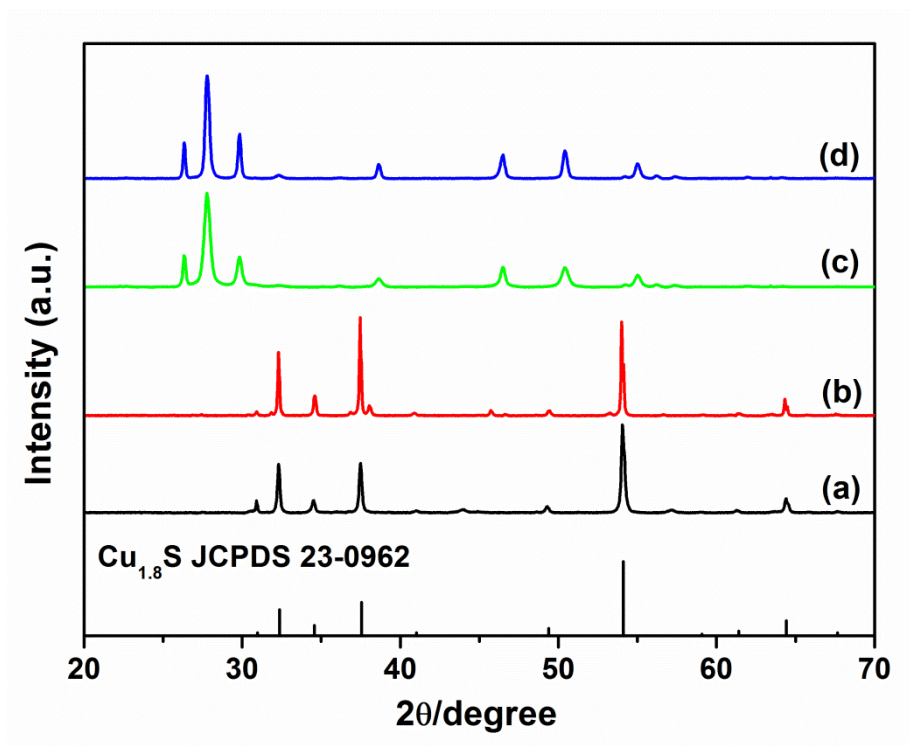

**Fig. S4** XRD patterns of  $\text{Cu}_{1.8}\text{S}$  nanocrystals prepared by the reaction of  $\text{CuCl}_2$  in (a) ODE and (b) OLA. XRD patterns of CIS nanocrystals synthesized by ion exchange between indium acetate and  $\text{Cu}_{1.8}\text{S}$  nanocrystals in (c) ODE and (d) OLA.

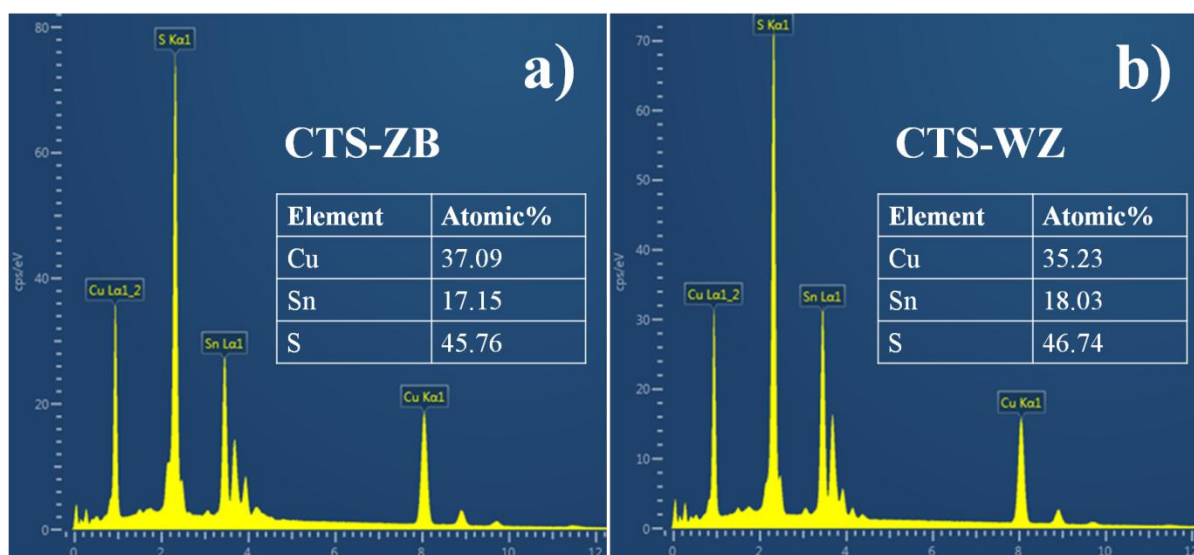

**Fig. S5** EDS spectra of  $\text{Cu}_2\text{SnS}_3$  nanocrystals with (a) zincblende and (b) wurtzite structures, respectively.

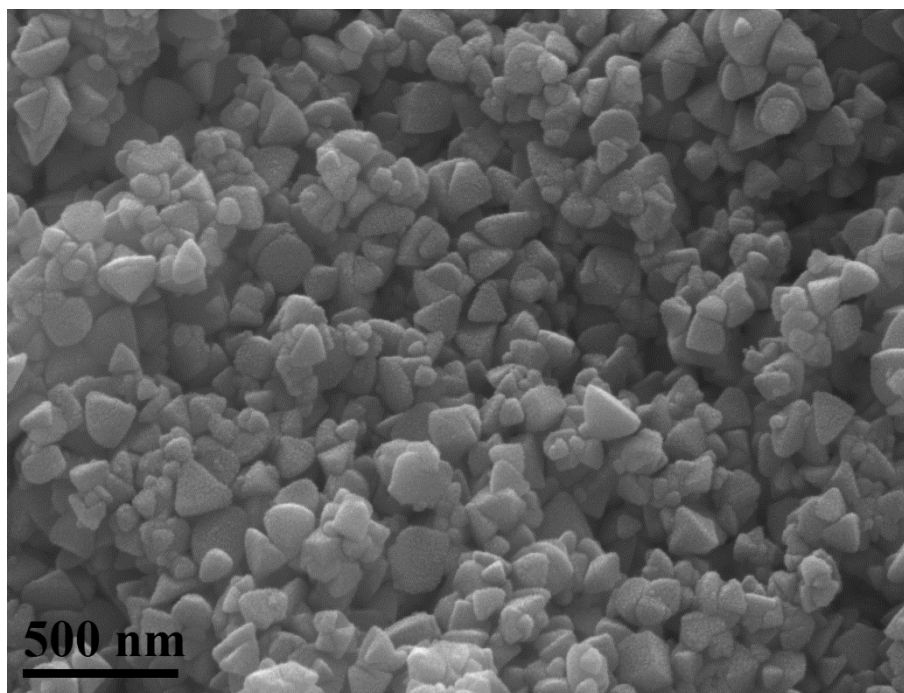

**Fig. S6** FE-SEM image of zincblende  $\text{Cu}_2\text{SnS}_3$  nanocrystals.

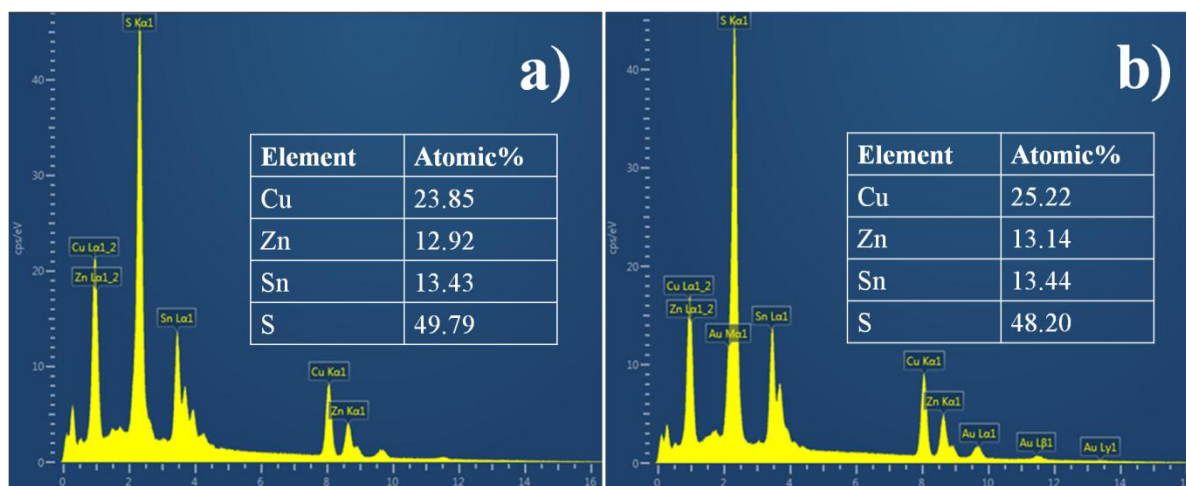

**Fig. S7** EDS spectra of  $\text{Cu}_2\text{ZnSnS}_4$  nanocrystals with (a) zincblende and (b) wurtzite structures, respectively.
